# Supplementary material
Source: MDPI journal article supplement (https://www.mdpi.com/2076-3298/10/5/79)
Supplement: s1 [file s1]

**Table S1. Protected Areas Update Categories and subsystems**

| Nº | Year<br>Fundation | Name                                  | Category                    | Subsystem | Area (ha)     |
|----|-------------------|---------------------------------------|-----------------------------|-----------|---------------|
| 1  | 1959              | Galápagos                             | National Park               | State     | 795.792,17    |
| 2  | 1968              | Cotacachi Cayapas                     | National Park               | State     | 260.961,46    |
| 3  | 1970              | Cayambe coca                          | National Park               | State     | 408284,57     |
| 4  | 1975              | Cotopaxi                              | National Park               | State     | 32.271,71     |
| 5  | 1977              | Cajas                                 | National Park               | State     | 29.389,37     |
| 6  | 1978              | Pululahua                             | Geobotanical<br>Reserve     | State     | 3.441,79      |
| 7  | 1979              | Cuyabeno                              | Wildlife Reserve            | State     | 594.950,48    |
| 8  | 1979              | El boliche                            | National Recreation<br>Area | State     | 395,28        |
| 9  | 1979              | Machalilla                            | National Park               | State     | 58.499,89     |
| 10 | 1979              | Manglares churute                     | Ecological Reserve          | State     | 50.070,11     |
| 11 | 1979              | Sangay                                | National Park               | State     | 486.612,53    |
| 12 | 1979              | Yasuní                                | National Park               | State     | 1.029.566,32  |
| 13 | 1982              | Podocarpus                            | National Park               | State     | 138.492,58    |
| 14 | 1985              | Limoncocha                            | Biological Reserve          | State     | 3.692,51      |
| 15 | 1987              | Chimborazo                            | Wildlife Reserve            | State     | 52.683,27     |
| 16 | 1992              | El ángel                              | Ecological Reserve          | State     | 15.974,51     |
| 17 | 1993              | Antisana                              | National Park               | State     | 120.581,27    |
| 18 | 1994              | Sumaco Napo Galeras                   | National Park               | State     | 206.161,74    |
| 19 | 1996              | LLanganates                           | National Park               | State     | 219.918,58    |
| 20 | 1996              | Los ilinizas                          | Ecological Reserve          | State     | 134.233,25    |
| 21 | 1996              | Mache chindul                         | Ecological Reserve          | State     | 119.993,79    |
| 22 | 1996              | Manglares cayapas<br>mataje           | Ecological Reserve          | State     | 56.387,91     |
| 23 | 1996              | Pasochoa                              | Wildlife Refuge             | State     | 619,36        |
| 24 | 1998              | Galápagos                             | Marine Reserve              | State     | 12.690.513,82 |
| 25 | 1999              | El cóndor                             | Biological Reserve          | State     | 2.433,29      |
| 26 | 1999              | Isla santa clara                      | Marine Reserve              | State     | 37.647,54     |
| 27 | 2001              | Arenillas                             | Ecological Reserve          | State     | 13.527,49     |
| 28 | 2002              | Cofán bermejo                         | Ecological Reserve          | State     | 54.947,17     |
| 29 | 2002              | Islas corazón y las islas<br>fragatas | Wildlife Refuge             | State     | 2.811,67      |
| 30 | 2002              | La chiquita                           | Wildlife Refuge             | State     | 811,85        |
| 31 | 2002              | Manglares el salado                   | Wildlife Reserve            | State     | 15.535,56     |
| 32 | 2002              | Parque lago                           | National Recreation<br>Area | State     | 2.148,88      |
| 33 | 2003              | Manglares estuario del                | Wildlife Refuge             | State     | 92.246,35     |

|    |      |                                       |                              |           |            |
|----|------|---------------------------------------|------------------------------|-----------|------------|
|    |      | río muisne                            |                              |           |            |
| 34 | 2006 | El quimi                              | Biological Reserve           | State     | 9.023,82   |
| 35 | 2006 | El zarza                              | Wildlife Refuge              | State     | 3.696,31   |
| 36 | 2007 | Manglares el morro                    | Wildlife Refuge              | State     | 11.806,81  |
| 37 | 2008 | Galera san francisco                  | Marine Reserve               | State     | 54.688,60  |
| 38 | 2008 | Manglares estuario del río esmeraldas | Wildlife Refuge              | State     | 242,58     |
| 39 | 2008 | Pacoche                               | Wildlife Refuge              | State     | 31.517,89  |
| 40 | 2008 | Puntilla de Santa Elena               | Wildlife Wildlife Reserve    | State     | 52.435,19  |
| 41 | 2009 | Yacuri                                | National Park                | State     | 42.888,34  |
| 42 | 2010 | Cerro plateado                        | Biological Reserve           | State     | 30.760,67  |
| 43 | 2010 | El pambilar                           | Wildlife Refuge              | State     | 3.108,92   |
| 44 | 2010 | Isla santay                           | National Recreation Area     | State     | 2.214,82   |
| 45 | 2010 | Los samanes                           | National Recreation Area     | State     | 851,65     |
| 46 | 2011 | Playas de villamil                    | National Recreation Area     | State     | 2.478,13   |
| 47 | 2012 | Siete iglesias                        | Ecological conservation Area | Municipal | 16.029,06  |
| 48 | 2012 | El pelado                             | Marine Reserve               | State     | 13.155,30  |
| 49 | 2012 | Quimsacocha                           | National Recreation Area     | State     | 3.217,15   |
| 50 | 2014 | Colonso chalupas                      | Biological Reserve           | State     | 93.163,31  |
| 51 | 2015 | Cantagallo machalilla                 | Marine Reserve               | State     | 142.266,45 |
| 52 | 2016 | Bajo copé                             | Marine Reserve               | State     | 39.952,50  |
| 53 | 2016 | Samama mumbes                         | Wildlife Refuge              | State     | 2.145,57   |
| 54 | 2017 | La bonita - cofanes - chingual        | Ecological conservation Area | Municipal | 53.093,82  |
| 55 | 2018 | Río negro sopladora                   | National Park                | State     | 33.742,15  |
| 56 | 2018 | Tambillo                              | Community Protected Area     | State     | 1.954,65   |
| 57 | 2019 | Marcos p rez de castilla              | Community Protected Area     | Community | 8.604,72   |
| 58 | 2019 | Cordillera oriental del Carchi        | Municipal Protected Area     | Municipal | 20.439,79  |
| 59 | 2019 | Bellavista                            | Private Protected Area       | Privada   | 347,69     |
| 60 | 2020 | Ichubamba yasepan                     | Private Protected Area       | Privada   | 4.790,13   |
| 61 | 2021 | Yacuambi                              | Ecological Conservation Area | Municipal | 26.913,38  |

|    |      |                                     |                              |                   |              |
|----|------|-------------------------------------|------------------------------|-------------------|--------------|
| 62 | 2021 | Mazán                               | Ecological Conservation Area | Municipal         | 2.023,11     |
| 63 | 2021 | Taita Imbabura                      | Ecological Conservation Area | Municipal         | 3.717,48     |
| 64 | 2021 | Neblina piedra                      | Private Protected Area       | Private           | 188,66       |
| 65 | 2021 | Neblina sur                         | Private Protected Area       | Private           | 690,64       |
| 66 | 2021 | Puerto cabuyal - punta san clemente | Marine Reserve               | State             | 130.427,10   |
| 67 | 2022 | Curiquingue gallocantana            | Municipal Protected Area     | Municipal         | 1.223,63     |
| 68 | 2022 | Hermanadad                          | Marine Reserve               | Estatad           | 6.000.000,00 |
| 69 | 2022 | Candelaria                          | Private Protected Area       | Private           | 2.698,77     |
| 70 | 2022 | Zuñag                               | Private Protected Area       | Private           | 757,73       |
| 71 | 2022 | Tiwi nunca                          | Community Protected Area     | Community Private | 5.497,85     |
| 72 | 2022 | Neblina Norte                       | Private Protected Area       | Private           | 912.33       |
| 73 | 2022 | Cazaderos                           | Private Protected Area       | Private           | 4.925,74     |
| 74 | 2023 | Mashpi Tayra                        | Area Private Protected Area  | Private           | 1.228,98     |

---
